# Supplementary material for: A novel swine model of the acute respiratory distress syndrome using clinically relevant injury exposures
Source: PubMed Central journal article supplement (PMC8123544; doi:10.14814/phy2.14871), 2021-05-15
Supplement: PHY2-9-e14871-s003.pdf [file PHY2-9-e14871-s003.pdf]

**White blood cell count**

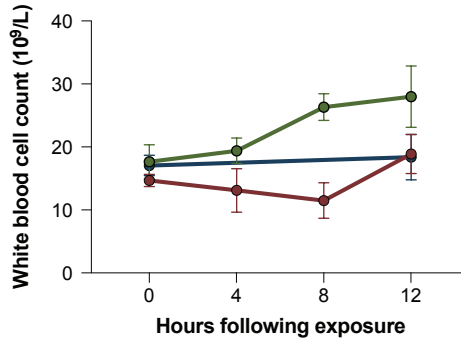

**% Neutrophils**

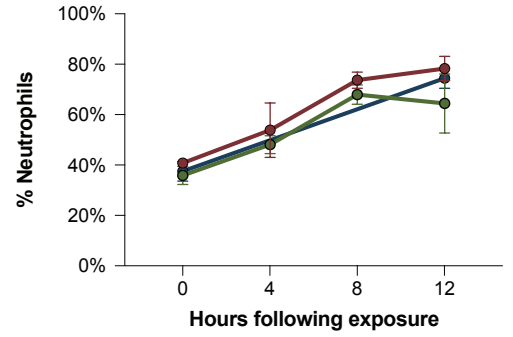

**Hematocrit**

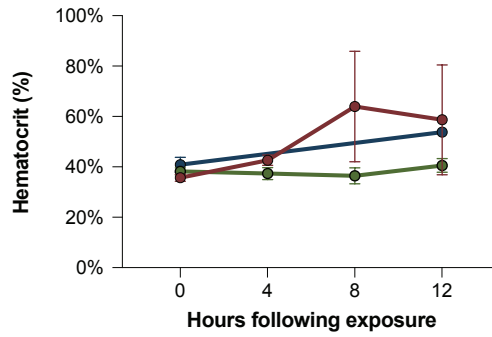

**Platelets**

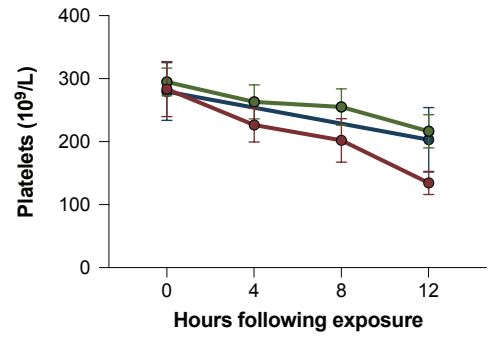

**Serum creatinine**

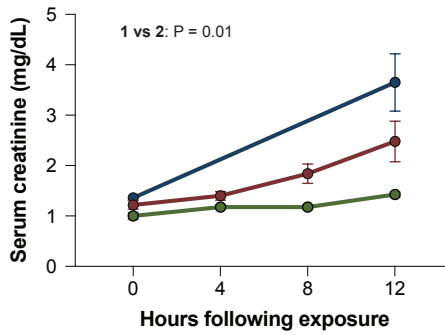

**Serum bilirubin**

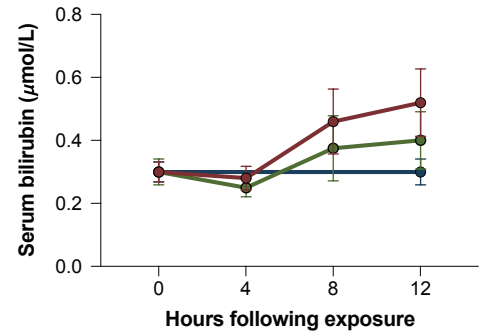

- **Group 1:** Indirect lung injury only (*E. coli* sepsis)
- **Group 2:** Direct lung injury only (hyperoxia, volutrauma, aspiration)
- **Group 3:** Combined indirect and direct lung injury

**Supplemental Figure 3.** Comparison of laboratory values across experimental groups. Healthy Yorkshire-mix swine, 14-16 weeks of age, were exposed to 1) *indirect lung injury* (*E. coli* sepsis), 2) *direct lung injury* (hyperoxia, volutrauma, and aspiration of gastric particles), and 3) *combined direct and indirect lung injury* (all above exposures). Lines and variance represent means and standard deviation. Significance determined using ANOVA with Tukey's multiple comparisons test. When not reported, P > 0.05.
